# Supplementary material for: Increased activity of lacrimal gland mast cells are associated with corneal epitheliopathy in aged mice
Source: PubMed Central journal article supplement (PMC9971332; doi:10.1038/s41514-023-00099-0), 2023-02-27
Supplement: 41514_2023_99_MOESM1_ESM.pdf [file 41514_2023_99_MOESM1_ESM.pdf]

### Supplementary Figure 1.

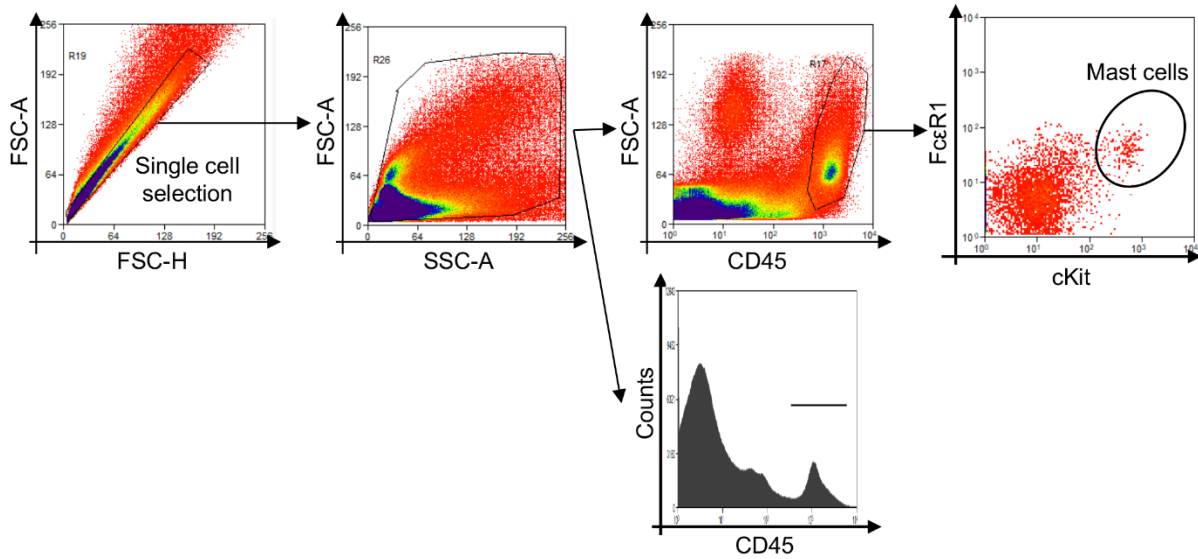

**Gating strategies for CD45<sup>+</sup> immune cells and FcεR1<sup>+</sup>cKit<sup>+</sup> mast cells.** Representative dot plots demonstrating the gating strategy for frequencies of CD45<sup>+</sup> immune cells (Fig. 4c) and FcεR1<sup>+</sup>cKit<sup>+</sup> mast cells (Fig. 1b, 1c & 4a) in single cell suspensions of lacrimal glands.
